# Supplementary material for: Impact of low-frequency coding variants on human facial shape
Source: PubMed Central journal article supplement (PMC7804299; doi:10.1038/s41598-020-80661-y), 2021-01-12

## **Impact of low-frequency coding variants on human facial shape**

Dongjing Liu<sup>1</sup>, Nora Alhazmi<sup>2,3</sup>, Harold Matthews<sup>4,5</sup>, Myoung Keun Lee<sup>6</sup>, Jiarui Li<sup>7</sup>, Jacqueline T. Hecht<sup>8</sup>, George L. Wehby<sup>9</sup>, Lina M. Moreno<sup>10</sup>, Carrie L. Heike<sup>11</sup>, Jasmien Roosenboom<sup>6</sup>, Eleanor Feingold<sup>1,12</sup>, Mary L. Marazita<sup>1,6</sup>, Peter Claes<sup>4,7</sup>, Eric C. Liao<sup>13</sup>, Seth M. Weinberg<sup>1,6\*</sup>, John R. Shaffer<sup>1,6\*</sup>

Supplementary Figures

**Fig S1. Implicated genes across broad facial regions from recent GWAS of common genetic variants (White et al. 2020 [1])**

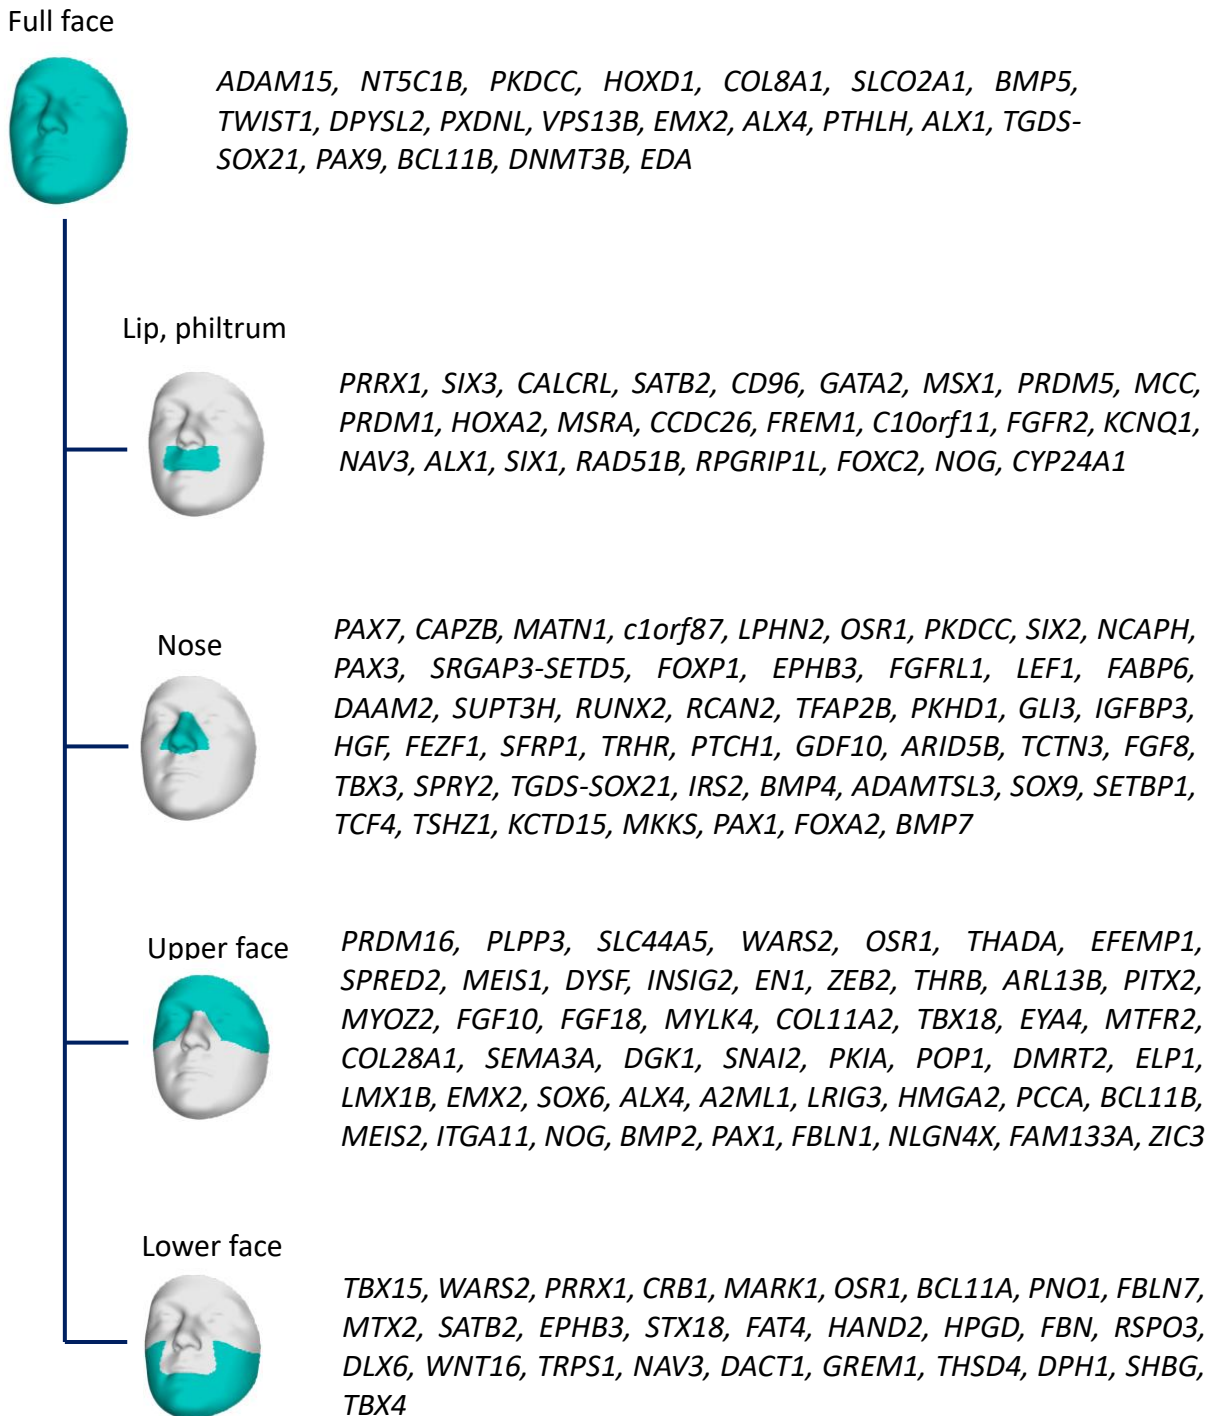

[1] White, J.D., Indencleef, K., Naqvi, S., Eller, R.J., Hoskens, H., Roosenboom, J., Lee, M.K., Li, J., Mohammed, J., Richmond, S., *et al.* (2020) Insights into the genetic architecture of the human face. *Nat Genet*, **66**, 101–9.

**Fig S2. Q-Q plot of gene-based MultiSKAT tests by facial module.** Genomic inflation factor  $\lambda$  is shown at the top left corner of each subfigure. There was little evidence for systematic inflation in p-values.

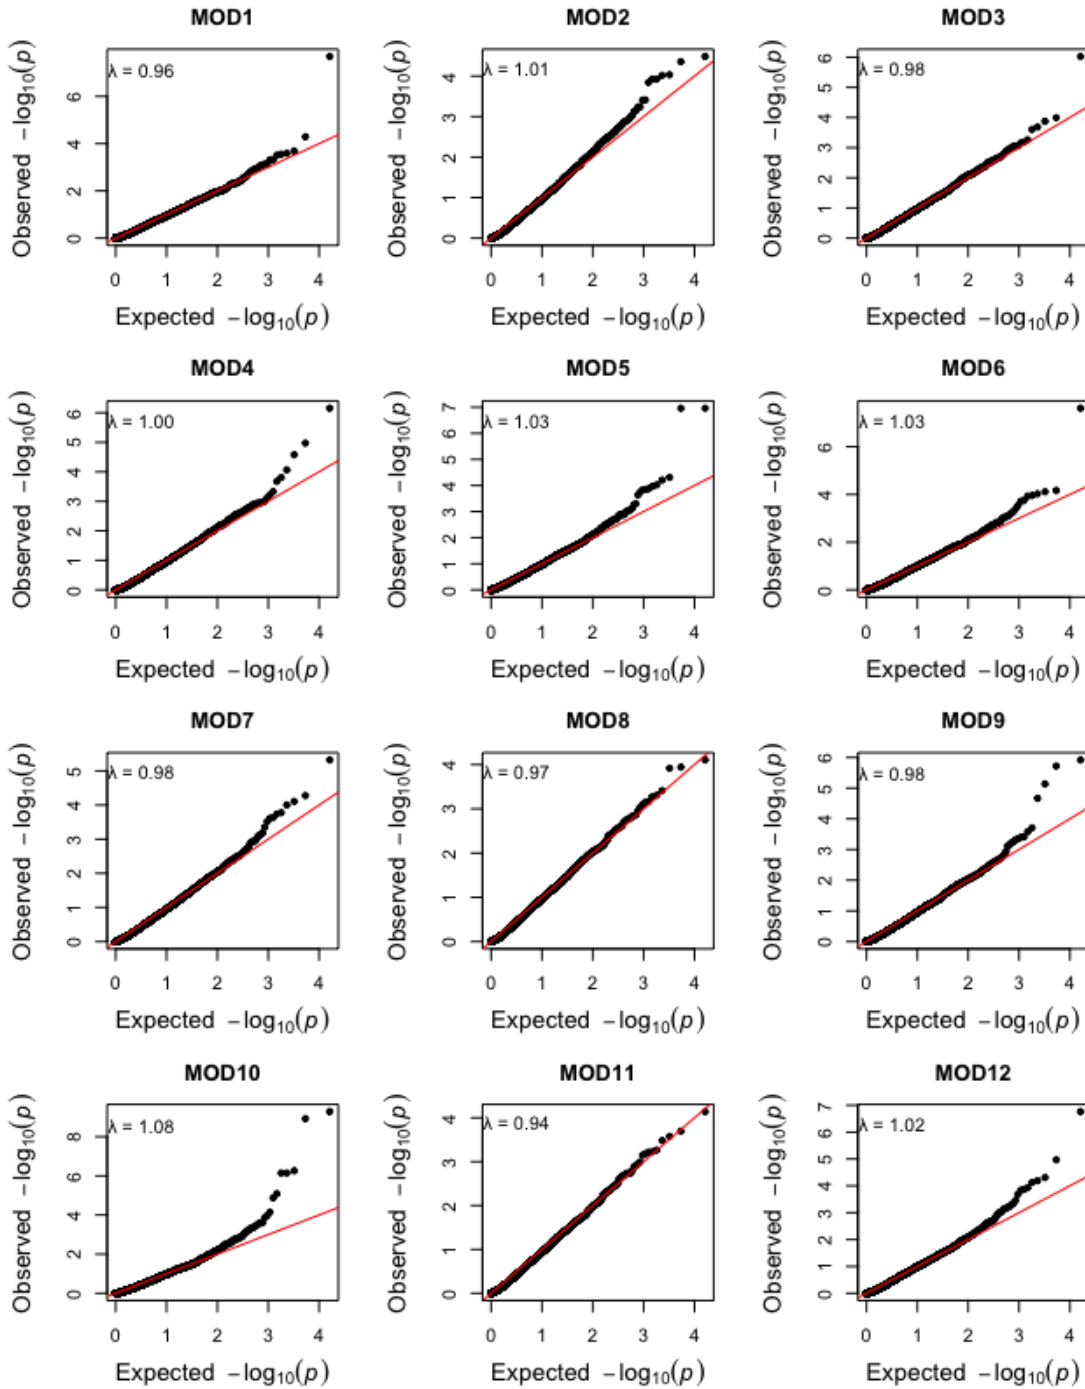

Fig S2. Q-Q plot of gene-based MultiSKAT tests by facial module (Cont)

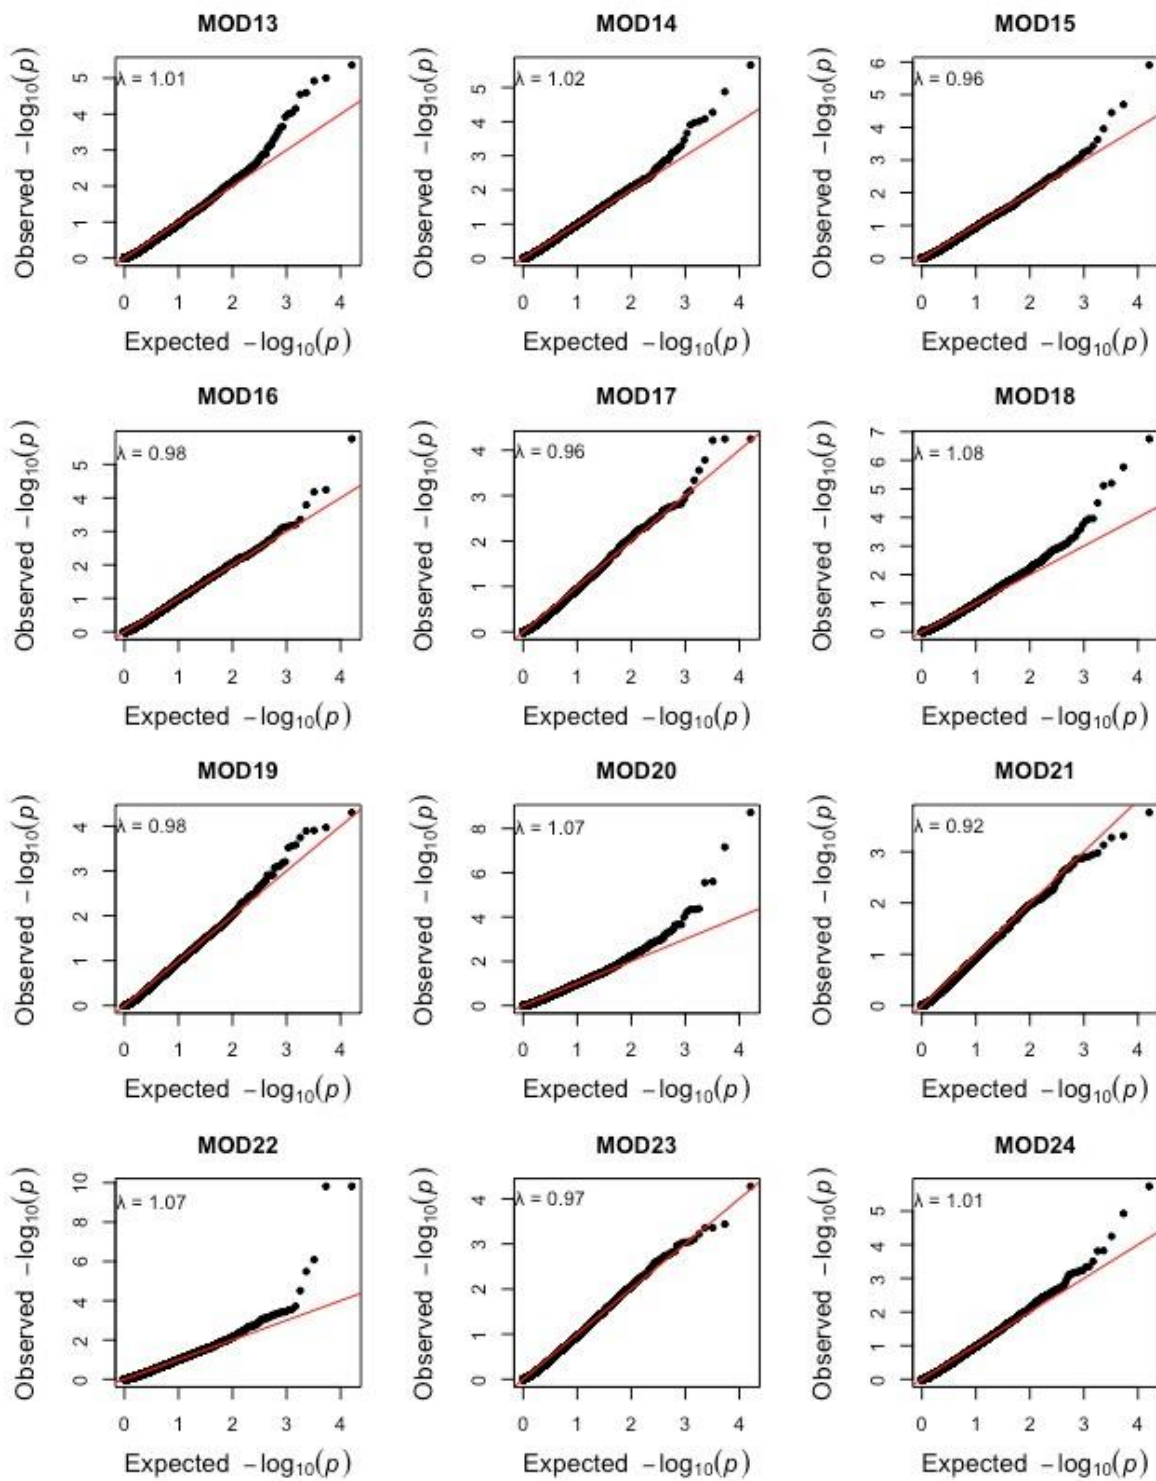

Fig S2. Q-Q plot of gene-based MultiSKAT tests by facial module (Cont)

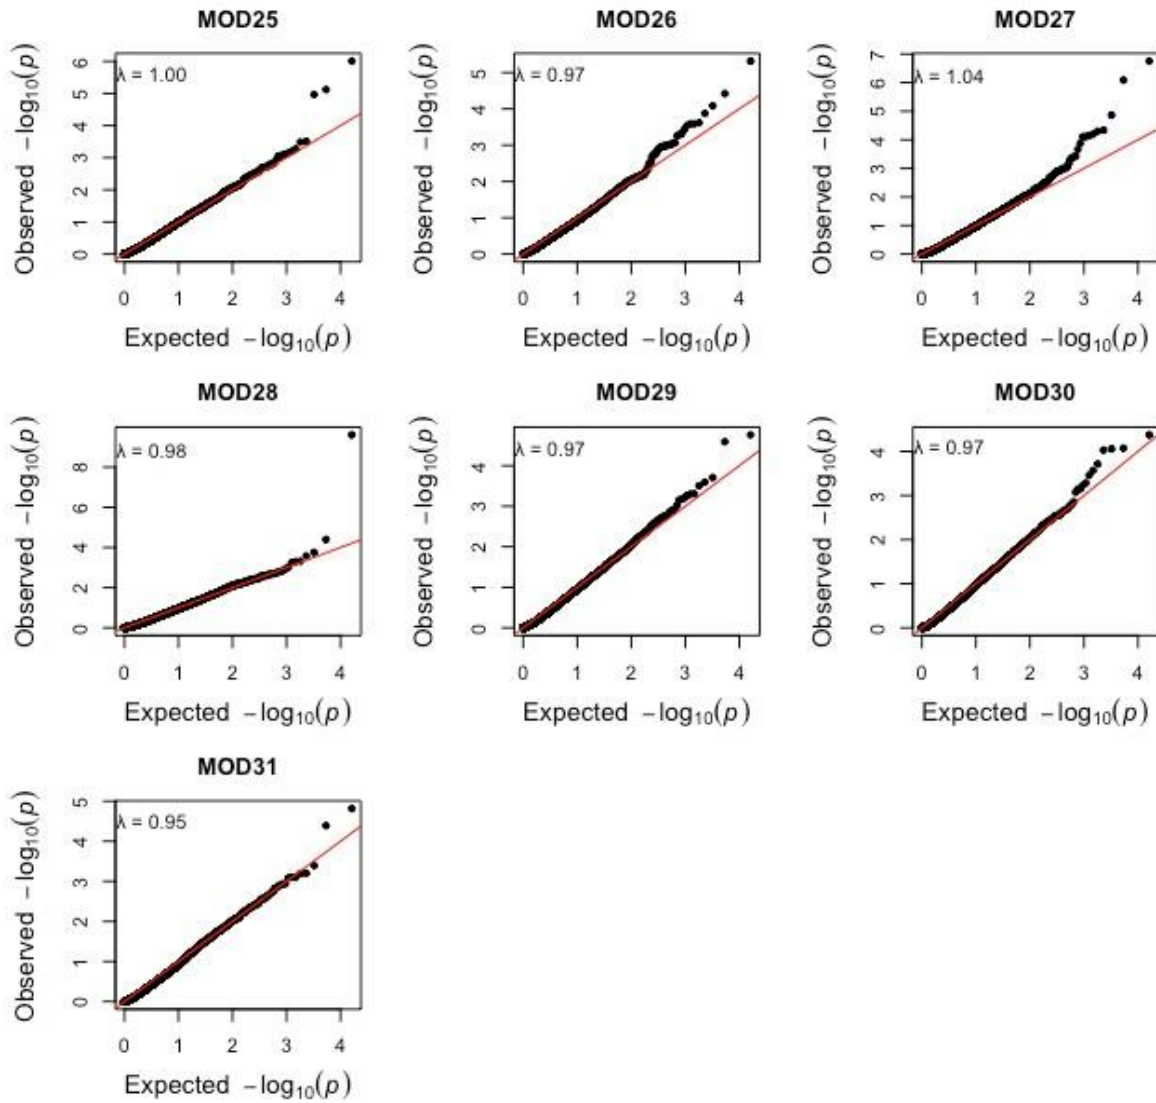

**Fig S3. FUMA enrichment results**

a) GO biological process

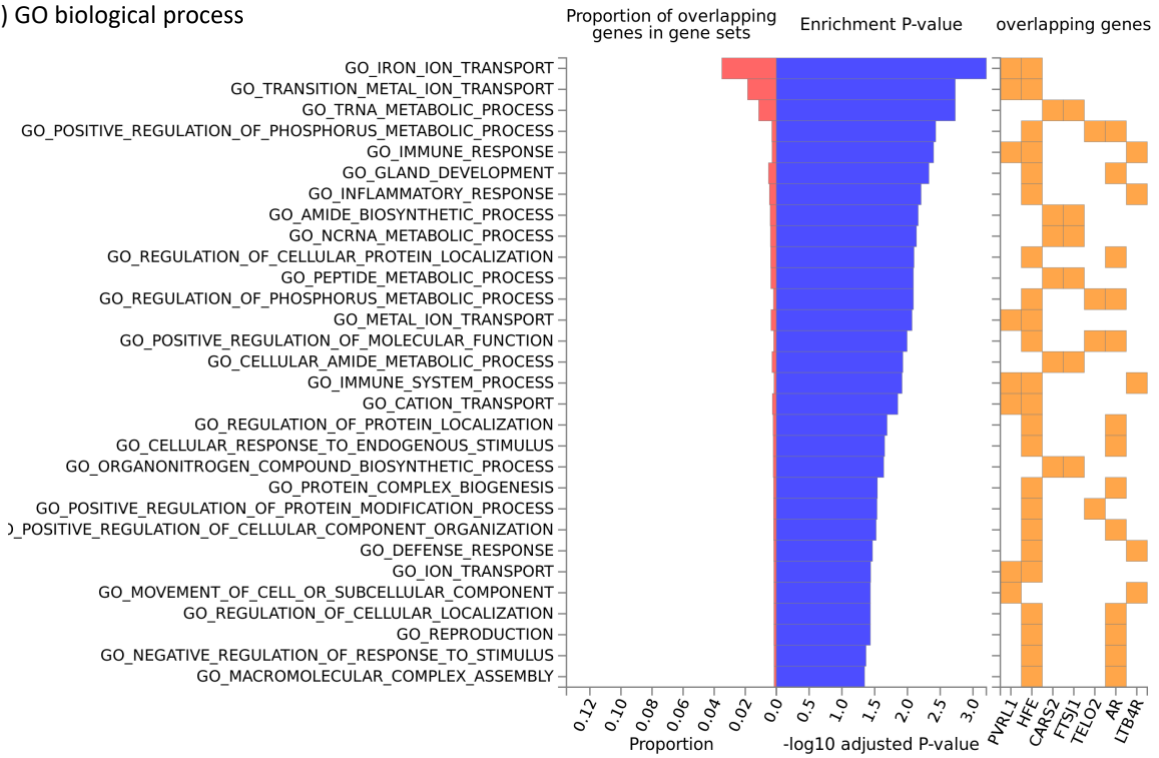

b) GO molecular function

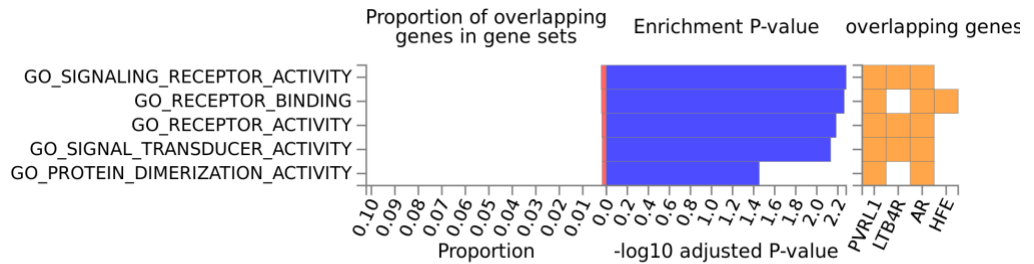

c) GWAS catalog

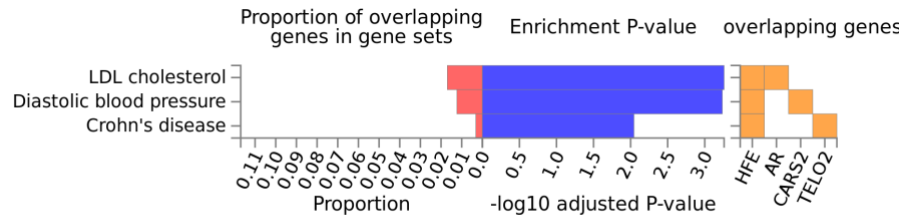

**Fig S4. GTEx expression of MultiSKAT significant genes in tissues relevant to facial morphology.** Dendrogram denotes similarity in expression level. TPM, transcripts per million

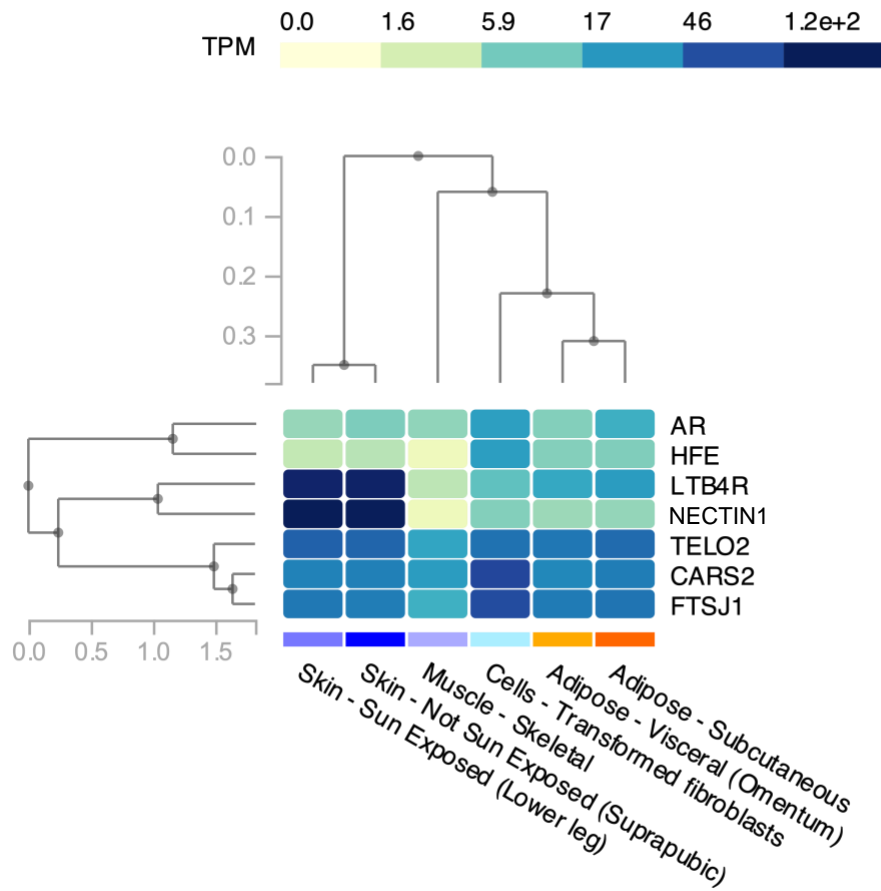

**Fig S5. Magnitude of variant effect on facial modules, quantified by the Euclidean distance between averaged faces of different genotype groups.** The 95% confidence interval was obtained by 5000 bootstraps. The farther away the blue (common) or red (low-freq) rectangular boxes fall from line  $x=0$ , the larger the group distances and the greater the magnitude of effects. Common variants that yielded significant GWAS association in the same cohort with the same modules are used as a comparison to low-frequency variants. Genotype groups column indicates the two groups of people of whom the faces were averaged and distance was computed. For example, 0 vs 1/2 means major allele homozygotes vs the remaining. The following two columns indicate sizes of the two groups in comparison. Low-frequency variants had large effects compared to previously reported common variants, although this could be a result from the much smaller size of carrier group and may not reflect genuine greater effects of low-frequency variants.

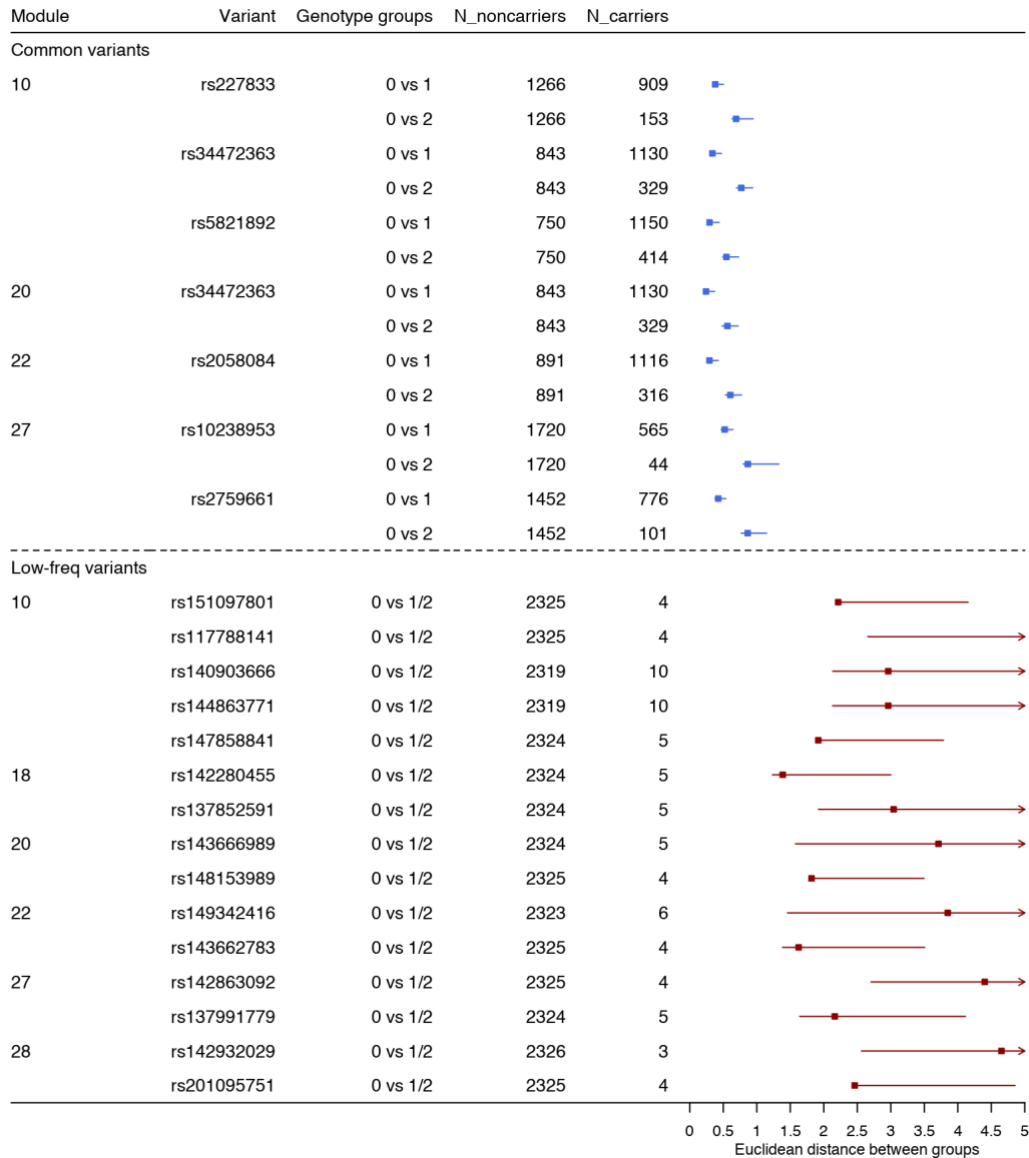

Supplement: 41598_2020_80661_MOESM2_ESM.pdf [file 41598_2020_80661_MOESM2_ESM.pdf]
